# Supplementary material for: DNA methylation-based estimator of telomere length
Source: Aging (Albany NY). 2019 Aug 18;11(16):5895–923. doi: 10.18632/aging.102173 (PMC6738410; doi:10.18632/aging.102173)
Supplement: Supplementary Data 1 [file aging-11-102173-s003.xlsx]

## Sheet: DNAmLTL_addgene_addmQTL
Columns A-B: DNAm TL model estimates
Columns C-J: Annotation the 140 CpGs in the DNAmTL model
columns k-v: summary statistics of genome-wide significant mQTL in McRAe et al. (PMID: 30514905)
The summary statistics lists mQTL results using the Brisbane Systems Genetics Study (BSGS) and the Lothian Birth Cohorts of 1921 and 1936 (LBC), respectively. Each mQTL was identified in one cohort at P <1.0e-1111and replicated in the other cohort at P < 1.0e-06
DNAmTL		CpG annotation								mQTL summary statistics (McRae et al.)
Variable	Coefficient	CHR	bp19	SourceSeq	Strand	Probe SNP based on Illumina annotation	Gene	location	Relation to CpGIsland	Probe SNP based on 1000 Genome	SNP	CHR.SNP	bp.SNP	ALLELE	BSGS.P	BSGS.EFFECT	BSGS.H2	LBC.P	LBC.EFFECT	LBC.R2	mQTL
Intercept	7.92478
cg05528516	-0.0349019	1	1070040	CGGACCCCCACCGGCCTCCAAATGTGCAAACACAGGCGCCTCTCAGGCAC	R		C1orf159-TTLL10		N_Shelf	N	rs74048017	1	1069602	T	2.613e-42	0.258	0.38864	2.561e-47	0.1696	0.142	cis
cg00060374	0.192655	1	1355235	CGGCTTCATGCTGGTGGCAGCAACAGACTCTCCGCCAGCGCCGGGCCTGT	R		LOC441869	Body;Body	Island	N	rs1240717	1	1346257	A	2.982e-58	-0.44	0.45741	9.873e-84	-0.5123	0.2409	cis
cg12711627	0.17827	1	2025769	CGGGCACCACACAGCATCCCAGGCACCATCATGGTAGGAGAAGAGTTCAG	R		PRKCZ	Body;5'UTR	Island
cg06853416	0.0548837	1	2778841	AGAGTCCCCCTCTGGATTCACACACCTGGAGGCGTCTGAGTGACTCCTCG	R		MMEL1-ACTRT2		S_Shore	N	rs12409348	1	2779043	C	2.594e-39	-0.206	0.34692	3.236e-78	-0.2415	0.2267	cis
cg01901101	-0.288137	1	9486939	CAAAAAAACCCCAGCTTTTGTCCAGAGGTTGCTTTTTGTGGGTCTGTACG	F		SPSB1-SLC25A33		N_Shore	N	rs10864418	1	9489972	G	8.212e-08	0.037	0.06047	3.506e-17	0.06817	0.05077	cis
cg21393163	0.231307	1	12217629	AGAAATGCAAATGAAATGACACCGGGCTCCACTTCACACCCATCAGATCG	R		TNFRSF8-TNFRSF1B
cg22866430	-0.132384	1	12566378	GCACCCCCCCATCCACTTCATGTTCAGAAAACTCAAAGAGTCAGAAAACG	F	rs78425617	SNORA59A	TSS1500;Body;TSS1500;Body
cg16047567	0.278311	1	12664243	GTCTTCTAAGATTTTCCTTAATTTACAGTGATCAAAGCTCTCAGGCCACG	R		DHRS3	Body		Y	rs4845908	1	12661028	C	1.044e-22	0.09	0.20298	3.061e-18	0.08328	0.05411	cis
cg18768612	0.0316889	1	22378488	CGGGCCTGTATTCAGTCCGCCGTGATGTGAGAACTGAGTATCACTCTTCT	R		CDC42	TSS1500;TSS1500;TSS1500	N_Shore
cg24049493	-0.148033	1	42385941	CGCGGCCACCACAGACCTGAGCCCAGGAGGCTCTGTGACAAGGCACAGAC	F		HIVEP3	TSS1500;TSS1500	S_Shore	N	rs2147904	1	42371414	C	8.392e-17	0.194	0.13828	1.669e-25	0.1887	0.07679	cis
cg08893087	0.164545	1	93416982	CGGCTTCCAGATTCTTTCCAGTTGTCAGAATTCAGTTACATGTGGTTGCA	R		FAM69A	Body		N	rs945631	1	93426167	G	3.313e-24	0.256	0.20179	8.196e-15	0.2379	0.04325	cis
cg03984502	-1.59036	1	151805661	TCTGAGGCTCTGATTATCCCCCGTGTTCTTTTGGTAAATGTGGGCCCACG	R		RORC	TSS1500
cg19233405	-0.236128	1	154988721	CGGAAGCACACGGGAGAGCGCCCCTACTCATGCCCGCACTGCCCAGCCCG	F		ZBTB7B	Body	N_Shore
cg05694771	-0.119074	1	160617974	CGTGCAAAGTTTGTCTGTCTGTGCCTGGCTTATTTCACGTAACATAATGA	F		SLAMF1	TSS1500
cg24739596	-0.0648983	1	243967381	ACACAGCAGAAGAAGACCCTTGACATCATCATCAGGGTTCTAGATCCACG	R		AKT3	Body;Body
cg06370057	-0.0479755	10	119786	CGCCCAAGCCACCATGAAGGGACGCTCGCACAAAGTGAAGTCCACATACA	F	rs7089857	TUBB8-ZMYND11		Island
cg24457743	0.0450135	10	71181606	CGGGCTGCAGCTGACATCTTCTTTAAACACTGAGAGTGTGCTGGGGGCAG	F	rs77246631	TACR2-TSPAN15
cg18148156	-0.337015	10	90428384	CGGCAGGTTGGAAATCCAGTTTGTGGCTGATGCAAGCAAACCATGCTGCA	R		LIPF	Body
cg19935065	-0.0719261	10	98062687	CGGTTGTGAGGTGCTCACGTGTTTTGGAGATAGCAAAAGTCTCAAATAAT	F		DNTT	TSS1500;TSS1500		N	rs1998409	10	98058355	G	1.456e-12	0.082	0.10396	2.7e-20	0.1194	0.06057	cis
cg10549018	-0.107792	10	98176740	TGTCTCCTCATCTCCTGGATCTTTGCCCAGCAAAACCTCCAAAGAGACCG	R		TLL2	Body
cg24903144	-0.0287228	10	102509268	CGCAAGGTAGAAAGCAAAGGGGGGACTGGAGAGAAACCAGATGACAGAAA	R		PAX2	Body;Body;Body;Body;Body	Island
cg17782974	-0.248277	10	104406990	CGCACACACACACCCTGCGGAGTTGCCGACAAAGTTCAGTGCCTGCTTCC	R		TRIM8	Body	S_Shelf
cg13357922	0.115934	10	135251512	CGCTACCACTAGACCAAGGTCAGCCAAGTAACAGTTGTCTTCCCAGACGC	R		SPRN-LOC619207		N_Shelf
cg23908305	0.199508	11	1958316	CGGCCCTTGTTAGGGACTGGCTACAGCGGCTGGCCCCAAGGGCCCCTGTG	R		TNNT3	Body;Body;Body;Body	N_Shore
cg15742496	0.0654733	11	5618408	CGGGCACACAGCCAGTGTCTGTCAGAGTCAGGATTTGAACACATGCAGTC	R		TRIM6-TRIM34	Body;Body;5'UTR		N	rs12272467	11	5617987	G	4.086e-19	0.144	0.16463	7.246e-24	0.1421	0.07172	cis
cg27639942	-0.0314091	11	64739336	ATAGCCTGGCCGAGCCTGGGAACCACCTGGGGCTGAGGTAACGGCACACG	F		C11orf85-BATF2		Island
cg27312916	-0.306783	11	85469117	CGACAGGTGCAGAGAGAGAATAAACTGTGTCTAAGACTGGACCAGAGAGT	R		SYTL2	TSS200;5'UTR;TSS200
cg02121547	0.0532665	11	113649020	CAGCCTGGGGACAAGAACATCAAATGTCCGAGTCTGAGCTGCCTGGTTCG	R		CLDN25	TSS1500		N	rs17541841	11	113639039	T	8.469e-51	0.49	0.46895	6.775e-59	0.5185	0.1747	cis
cg26827653	0.0658946	11	125366540	CGGAAAGTCCAAAAGGGTCTTTGAGTGTGTCTGCCGGCATCCGCCAGCAG	R		FEZ1	TSS1500;TSS1500	S_Shore
cg16593899	0.3522	12	212239	TAAAGCCCTGTCATTAGCTGGCAGCAGGGAGGCGGTCGGTAGGGGCAACG	F	rs74331509	IQSEC3	Body;5'UTR	N_Shore	N	rs7964360	12	216210	A	9.007e-37	-0.123	0.31681	3.022e-46	-0.1273	0.1389	cis
cg02319782	0.646594	12	291668	CGGGTTCCCTCCCTAGGGAACCAGGCTGCCTAACCCACCAGCCGGCCCCT	F	rs78240398	IQSEC3-SLC6A12			N	rs57052808	12	294243	C	2.486e-41	-0.101	0.33692	2.011e-40	-0.1118	0.1218	cis
cg26276120	0.230154	12	6977747	CGGCATAGGCACCTCACAGACTCAGCATTCTCCAGGGAGCAACCCTGCTT	R		TPI1	Body;Body;Body	S_Shore	N	rs2071065	12	6977069	T	1.813e-18	0.07	0.1674	6.644e-24	0.09982	0.07184	cis
cg12745325	0.0192501	12	56623942	CTCCTCTGATGTCTGACCTGGCCTAAAATCAGGCAAGCAAAGTCTGATCG	F		SLC39A5	5'UTR;TSS1500
cg07677157	0.0236359	12	66050928	CGGTGATCCATAGCAAAAGAGCCTATGAGTCAGGTGATGATCCATTCATC	R		MSRB3-RPSAP52
cg07910460	-0.006545	12	99135985	CGCGCTCCTCCACTGTCTGAACCAAGTTAGGAGCCCTGATTAAACCTCCG	R		ANKS1B	Body;Body	N_Shelf
cg01614102	-0.000924423	12	115134918	CAAAGGAAATCGCAGGCGTCTTTGCAAAGCTGGTGGGAAGTAACCCAGCG	F		TBX3-MED13L		N_Shore
cg20742385	0.00035546	13	113633654	CGGCTGGGTTTCTCTAGCACCTCGGCATTGTCTGCCTGCTCTTCCAGGCG	F		MCF2L	Body;5'UTR;1stExon	N_Shore	N	rs9549619	13	113632620	C	4.177e-63	0.256	0.54393	1.007e-137	0.3209	0.3672	cis
cg05019423	0.0620879	14	105330230	CGGGTGTCAAAGTCAGTGGATGGCAAAACATGCCTGGAGGGAGCAACCAG	R		KIAA0284	TSS1500;TSS1500	N_Shore
cg19825410	0.0404215	14	106092151	TCTCACCAACTCTCTTGTCCACCTTGGTGTTGCTGGGCTTGTGATCTACG	R		TMEM121-KIAA0125
cg02963381	-0.0823562	14	106936375	CGGCCCCCAGCGCCCGCGCCCATCCTGGAGAACTGCATCTGCGCAGGCCC	F		ADAM6-NCRNA00221		Island
cg00843787	-0.101383	15	24119320	GATTTGTATTCTTTTCTTTTCCTTTTTTGAGATGGAGTCTAGCTCTGTCG	R		NDN-PWRN2		N_Shelf
cg08107689	-0.0776044	15	29033901	CGCGGCGTCGCCCTCCGAGTCGCGCTCAGAGCCACTGCTTTATGTTCAAA	R		WHAMML2-APBA2		Island
cg04875128	-0.102338	15	31775895	CGCCACGTACCCGCAGCAGAACCGCTCGCTGTCGTCGCAGAGCTACAGCC	R		OTUD7A	Body	Island
cg26709300	-0.250191	16	30106682	CGGTGACAATCATCCAAGTAGGCCTGAAACGTCTTGGGCTTTGAAATCCG	R		YPEL3	1stExon;Body	N_Shore	N	rs12444415	16	30118345	C	9.64e-25	0.08	0.20856	1.467e-18	0.06668	0.05512	cis
cg27093918	0.085073	16	69564625	CGCACTAAGAAGGGCTCCTGGGTGCTCAGCACCTAAAGTGGGTCATTCAT	R		CYB5B-NFAT5			N	rs56096139	16	69563412	T	1.689e-14	-0.079	0.11732	1.754e-14	-0.09337	0.0422	cis
cg02282640	0.0883252	16	81743587	ACTTTAGATCAGGTCAAAGGTTCCAATTACGAAGCTAAAAGAATTCGGCG	F		CMIP	3'UTR;3'UTR
cg02380595	0.00225187	16	85160569	CGGAGAGGGGCGCCTTCTCCATCTGTACGGCCTCACCGGGACTTTCCTCC	F		FAM92B-KIAA0182		S_Shelf	Y	rs11641810	16	85161172	T	5.84e-17	0.127	0.14124	3.445e-09	0.1018	0.02528	cis
cg04658841	-0.144128	16	85478651	CGGGGGCTGTCTTTTCTGCACGCCTTGCCCTTGATCTTCCCTGGCTTTAT	F		FAM92B-KIAA0182
cg07955474	0.0454601	16	85935556	CAACATTTCCAAGAACAGTGCTGGAAATCCCCAAGACAGCTGGATAGACG	F	rs16882	IRF8	5'UTR	S_Shelf	Y	rs305082	16	85936978	T	5.032e-35	-0.149	0.29225	1.498e-57	-0.1976	0.171	cis
cg07708487	0.113307	16	89387014	GGAGTGTGCCAGTGGCTCGTGTGGGGGACTCCCACCACCCTGGACTCTCG	F		ANKRD11	5'UTR
cg00974523	0.0146074	16	90124400	GGCTTCTCCCCTGTGTGTGTCCTCTGGTGACTGAGGAGGTCTGACTTCCG	R		PRDM7	3'UTR;3'UTR
cg15825321	-0.0151549	17	36666642	CGGCCGTCCTTCAGCTCGCACCACCTCATGCCCTGCGACACTCTGGCGCG	F		ARHGAP23	Body	Island	N	rs8182313	17	36600870	G	2.99e-11	-0.255	0.08511	6.707e-11	-0.1997	0.03076	cis
cg14244013	-0.0670537	17	59473124	TCACAGGCTCTGGGTTCGCGTTCGGAAACGCTTTCGCAGGGAGCGGGTCG	F		BCAS3-TBX2		Island
cg25583580	0.250883	17	74731433	CGTATTCCTGGCCAAATAACCAAGGTGAAGAAAGGTAAGGGGAAGAAAAA	F		SFRS2	3'UTR	N_Shore
cg18826274	0.0275873	17	76335184	CGCCCTGAAAGATTGTAGTACAGAGTCCTGGGGAGAAAGTGGTTTCCTGC	F	rs73380163	ARGM1-SOCS3		N_Shelf	Y	rs7221341	17	76331471	C	9.094e-56	-0.213	0.52303	3.361e-96	-0.2278	0.2722	cis
cg18836174	0.300339	18	11724	CTCCAACCCCAGCTTTTTCACTAGTAAGGCAGTCGGGCCCCTGGGCCACG	R		NA-USP14		Island
cg06994022	0.0299721	18	45660070	AGATTGTGTTTTTCCTTTCTAAAGCCTCCTGCTTCATAGTAACTTCCACG	F		ZBTB7C		N_Shelf	N	rs4940292	18	45678752	C	5.707e-28	-0.148	0.21764	1.954e-22	-0.1705	0.06727	cis
cg19283806	0.115235	18	66389420	GATTTCTCCTTGAACAATCCCCGCAAAGATAGCAGCCAAAAAAGGATGCG	F		CCDC102B	5'UTR
cg23686403	0.433578	18	78005607	TGGCCGCGATGCTCCTTTCCCCAGGCTCTGGGATTGTGGACAGGAGGGCG	F		PARD6G	TSS1500	S_Shore
cg02194396	0.0518449	19	427162	ACATCTGTGTTGAGCTTTTTTTAGATCTTCCCAAACAATCTGGCATTTCG	F		SHC2	Body	Island	N	rs113058919	19	457805	C	2.536e-21	0.168	0.17386	1.083e-23	0.1847	0.07118	cis
cg07069844	-0.222903	19	1617027	CGTGGAAGTCCGCTTCAGCACATCAAGAGATTAAGGAAATGCAAATTAGG	F	rs75418372	TCF3	Body;Body	S_Shore
cg00593900	-0.0890809	19	10206746	CGCGAGCTGGCGCAGCTCGTCACCCAGCAGAGCAGTCTCATCGCCCGCCT	R		ANGPTL6	Body	Island	N	rs55752217	19	10218434	C	4.601e-40	-0.368	0.35545	1.362e-51	-0.2754	0.1542	cis
cg13523818	0.0196837	19	19371900	CGGCAGGGCAAGACGATGGTGCCACCACGGTGGCTTACCACCTGCCCAGG	F		HAPLN4	Body	Island	N	rs4808934	19	19370917	C	4.309e-27	-0.178	0.24199	2.49e-34	-0.1839	0.1037	cis
cg26950531	-0.0719754	19	38704515	TGCCGGCCACGTGGTTGCTGGGCAGGTGTGGGGTCAGGCTGTGGATCCCG	F	rs4803871	DPF1	Body;Body;Body	S_Shelf
cg06673536	-0.0386957	19	45213941	CGCTGAGCTGTTGGGGAGCCACCGAGGCCATAAACGTCCTGGTTAATGCA	F		CEACAM16	3'UTR	S_Shelf	N	rs62120573	19	45214556	T	2.086e-30	0.186	0.2589	2.072e-45	0.2482	0.1364	cis
cg19327213	-0.261519	19	47988783	CGAGGTGTCCAGGACAGCTGGCCAACCCATGTCTTCTGGAAATGATACAC	R		KPTN	TSS1500	S_Shore
cg26636010	-0.0102656	2	20306539	GGTGAGCGCCGGCTGGGCTTGATGGGAGGCTGAATCCCGTTCGTGGACCG	F	rs13022175	LAPTM4A-SDC1
cg10550416	-0.00119707	2	36776323	TTCTGATGTGCTCGTCTGGTAGTTCTAAGGTGGTTATGGCAGCTGGGTCG	F		CRIM1	3'UTR
cg01603921	-0.0191199	2	91635595	CGGCTTTTTGTGCCCATCACCGTAGCTTTTTGCCTCCGCCACCACAGCTT	F		ANKRD36BP2-LOC654342		Island
cg23631636	1.06494	2	217363620	TGGGCTCGGACCTAGGTCGCGGCGACATGGTGAGTGTGGGTCTCTGTGCG	R		RPL37A	Body	Island
cg07374224	-0.104763	21	43809848	GGGCAGGTTCCTTGGTGACAAAGCCATGAGCATGGCCAGCAGCCCTTGCG	R		TMPRSS3	Body;TSS1500;Body		Y	rs3829962	21	43816624	C	1.433e-49	0.226	0.43714	1.06e-100	0.2893	0.2831	cis
cg06139893	0.366268	21	47404109	CTGTGTGTCAGCCACGGCCAGGGTGGGGCAGCCTGTCCATCTGGGTGACG	R		COL6A1	Body	Island
cg09374293	0.271147	21	48081242	CGATTCTGTCATGAAGAGTGGCTTAAAATACTTGAAAAAAACTGTAATGC	R		PRMT2	Body;Body	Island
cg21461082	0.0861276	21	48081619	CGCTGAATGCGTCAGGAACCGTAGAAAAGCCCCCCAGCCTGGGGAAACCA	R		PRMT2	Body;Body	Island	N	rs8127804	21	48068946	G	1.869e-14	-0.179	0.12347	1.951e-21	-0.2244	0.06415	cis
cg01239389	-0.0460397	22	16867554	AGCCGCAGCGGCGGGGGGCAAAAAGCCGTGGCTGGCAAAAAGCCGAGGCG	F	rs79439702	OR11H1-CCT8L2		Island
cg06845706	-0.0736532	22	23733812	CGGCCCCATGAGTGCTCTTCGGCCGCCCAAAACCGGTCCCATGGGTAACA	F	rs34542232	ZDHHC8P	Body	S_Shelf	N	rs6003678	22	23732284	A	1.684e-07	0.15	0.05685	6.361e-24	0.4054	0.07189	cis
cg15223899	-0.0794693	22	24891158	CGGCACGTGCCAGGACACGTTCCTCTTGCCGCCTCCGCAGCACACGGCCA	R		C22orf45	TSS1500;TSS1500;TSS200	Island
cg00733150	-0.143119	22	45705707	CGCGCGCCCCGCCCCGCCCCGCCGCCAGATCCTCTGGCACCGCCCACCTC	R		FAM118A	5'UTR;TSS200	Island	N	rs5766639	22	45700340	C	2.866e-63	0.383	0.55516	1.211e-242	0.5229	0.5558	cis
cg18405719	0.132496	3	153242	CGAGGCTAAAATGTGGGGCCAGAAGATAAATCTAATGAGAGCTGTTGCTA	R		NA-CHL1			N	rs9757900	3	190250	A	1.668e-27	0.134	0.25136	1.449e-36	0.1546	0.1104	cis
cg04508804	-0.0163919	3	45077765	CGCCCCGGTCTGCTGCTAAGCACAGCACAGTTACCAAAGCCAGGAAACTA	F		CLEC3B-CDCP1		S_Shore	N	rs4683022	3	45048472	C	1.705e-46	0.347	0.40288	8.607e-50	0.257	0.1491	cis
cg00840990	0.00929486	3	177308016	CCACATTACTAGGTAATAAGGTTGCAAATTCCAAGTCTCCCTTGTAGTCG	R		TBL1XR1-KCNMB2
cg09217898	0.00222377	3	194412522	CGTGTGTGGACACACATGGTTTCCCTAAAGAAACACCTCTCACTGCCCCA	F		FAM43A-C3orf21		S_Shelf
cg05023043	-0.241885	4	298432	CGCCCCTGGTTTGTAGGCAGGCGTTCAGAAATGAAGACGGGTGTCCAGAG	R		ZNF732-ZNF141		N_Shore
cg19651128	-0.0441973	4	2404041	CGGCCAGGCAAGCCGGCACCGCCCCCGCCATCAGACACCATCTCCCGCCC	F	rs7437490	ZFYVE28	Body	S_Shelf	Y	rs3135088	4	2392274	C	3.212e-72	-1.892	0.65223	0	-2.112	0.6627	cis
cg02810967	0.115542	4	17813558	CGTACTGGTACTAAAGGCTTATTGAGAATCAAAGATATTGAAAAAAATAT	F		NCAPG	Body;TSS1500	S_Shore
cg09435170	0.0665748	4	184256627	CGGGAAAATCACATCTGTTCTTACCAGTTCATTCTTGGTACTATGACTCA	F		WWC2-CDKN2AIP
cg00580497	0.2946	5	1153746	CGGCTTGTGGCAACAGGGGCTTCCCCATGGGCTGTTCCTTGGCTCTGTAG	R		SLC12A7-SLC6A19		N_Shore	N	rs71593390	5	1153811	T	8.569e-24	-0.08	0.20801	3.902e-45	-0.1191	0.1356	cis
cg00461022	-0.00353365	5	16618052	CGGAGTGGCTCTGAAATTACTGTCTTCAAAGCAGGCCAAACCTTGCTTGA	R		FAM134B	TSS1500	S_Shore	N	rs35004	5	16617903	C	1.403e-37	-0.146	0.3448	3.099e-79	-0.1839	0.2293	cis
cg22657457	0.0181492	5	75469969	CTACAAAAATTCCTTGAACAAATTGTACAGTCAAAGCAGACTTTCCAACG	R		SV2C	Body	Island
cg10616795	0.0140596	5	76464212	GGAGGCCAGGGAGCAGCGAGGCTGCACGGCAGCCCTGGCACAGAGCCTCG	R		LOC728723-PDE8B
cg06677021	-0.0278232	5	79490511	CGCTGCCTGGGGCCCTCAGCAGCGATCTTAGCTTAGTTACATTTCCCATC	R		SERINC5	Body		Y	rs34061557	5	79495183	C	2.366e-46	-0.309	0.41955	1.362e-51	-0.2563	0.1542	cis
cg02403883	-0.0261236	5	140530028	CGGGTTGTTTTCAAAGGGAACAGACAACATTTGCAGTTTGATCCACAGAC	F	rs3836745	PCDHB6	1stExon	N_Shore
cg21777188	-0.130913	5	140536238	CGCCCAGAACTGGGACTTCCCAGGTTCTCATAGTGATTGTAGATATCAAT	F		PCDHB17	Body	N_Shore
cg03335262	-0.0439933	5	140536920	GAAAACCGAGTACAACATAACCCTGCGGGTCTCCGACGTCAATGACAACG	R		PCDHB17	Body	Island
cg27582059	-0.0133799	5	140559871	TCTGGTGGACGTGAGGGGCACCGGGAGCCTGTCTCAGAACTATCAGTACG	R		PCDHB16	TSS1500;1stExon	S_Shore
cg08985570	-0.0174455	5	140589751	CCAGCACGGTTATGTTGTGCTCGGTTTTTAGCCTGGGGGTCCCCAAGTCG	F		PCDHB12	1stExon	Island
cg27577149	-0.109795	5	140712441	CGCCTCCCGAAGCCTGTAGCAGACGTGACTTGTGCCAGCGCCGCAGCCTG	R		PCDHGA1	1stExon;1stExon	Island
cg13650304	-0.00449912	5	140745619	CCTTGGTCACCAGGTAGCCAGGTTCTGCGGAGCGAGGCGCCAGCTCCACG	F	rs11750908	PCDHGA4	Body;Body;1stExon;Body;Body;Body;Body;1stExon	Island
cg19247475	-0.0195104	5	140789745	CGCTTCATCTGGTCTTCGCAGACAACTTGCAAGAGATACTGCCAGACCTC	F		PCDHGA4	Body;Body;Body;Body;1stExon;1stExon;Body;Body;Body;Body;Body;Body;Body;Body;Body;Body	Island
cg10679597	-0.00101932	5	140800629	ATACTTCTAAGTCTCCAGTGTCAGGATCTGTGAGTATCCATCTCATTCCG	F	rs11575964	PCDHGA4	Body;Body;Body;Body;Body;5'UTR;5'UTR;5'UTR;Body;1stExon;Body;Body;Body;1stExon;Body;Body;Body;Body;1stExon;Body;Body;Body;Body	N_Shore
cg18104870	-0.011462	5	176973910	CGGCTTGGGCCCTCCTTGTGGCTCATTGCACCCAGGAGGCAGTTCAGCGG	R		FAM193B	5'UTR;Body
cg16867657	-0.941317	6	11044877	CGGCGGCTCAACGTCCACGGAGCCCCAGGAATACCCACCCGCTGCCCAGA	F		ELOVL2	TSS1500	Island
cg22328256	-0.0588772	6	28757381	ACCCAATGGGTTGCCTCCATTTATAACCCATTTCTATGCCGTGAGCTTCG	F		SCAND3-TRIM27		S_Shelf
cg17636541	0.293414	6	30658493	CGGCCGAGAAGCTACAGGGGAGGGAGACCTGAGTTCTAAATTAGGAACTC	R		NRM	Body	S_Shelf
cg01517384	0.0134096	6	31323856	TCAGGAAAACTCATGCCATTCTCCATTCAACGGAGGGCGACATTCTAGCG	R		HLA-B	Body	N_Shore	Y	rs188103849	6	31397568	T	3.122e-16	-0.283	0.13458	1.006e-75	-0.6008	0.2202	cis
cg27014438	0.0641888	6	31607674	CGGGATTCAGAGCTAGGTAATCCACAAGAGGAAACCCACCTTAAAGGAAA	F		BAT3	Body;Body;Body;Body		Y	rs114322407	6	31669295	A	3.904e-74	0.934	0.73255	1.034e-133	0.7246	0.3586	cis
cg07739478	0.0442522	6	31692234	CGGTGGGGTAGAGTCTAAGTTGTTTCCGGTCTGAGCCTTCAAGTTGCTGG	F		C6orf25	Body;Body;Body;Body;Body;Body	S_Shore
cg08453194	0.671436	6	41904398	TCCTCCTCTCCAAGATTATACCTTTGCCATGTACCCGCCATCCATGATCG	F		CCND3	Body;Body;Body;Body
cg21288889	-0.319351	6	89792677	AACAACAAAAAACTTAAATTTCCCTTGACTTTTAAGTTCACTCTTGTTCG	F	rs5878087	PNRC1	Body	S_Shore	Y	rs9451129	6	89769158	G	2.668e-15	-0.082	0.12753	2.905e-22	-0.109	0.06673	cis
cg17885226	-0.0297804	6	105388731	GAGTCTGTCACTTCCTGAGGGAGCGCGGAGGTCGAGAGACCTGTGAGGCG	F		HACE1-LIN28B		Island
cg06638568	-0.141896	6	163730822	GGCTGAAGCGGCAGCATCGCACTCTCAAAGGGAACAGCGAGACCACACCG	F		PACRG	Body;Body;Body
cg20978460	0.626194	7	2644443	CGCCGAGGAGAGAGCTGCCACGGCAGCAGGGAACGTGACTCCCTTCACTG	R		IQCE	Body;Body	N_Shore
cg03366574	-0.000993911	7	2764599	CCGCCAGGACAGAGAAGCCGGTACCCCAGCGGGTGGTCTGCTTTTCTGCG	R		AMZ1-GNA12			N	rs798549	7	2760750	A	1.093e-30	-0.159	0.27061	9.263e-56	-0.24	0.166	cis
cg10536999	0.743224	7	26193109	CGACTCTCCCGGCCTAACGCAAGGACCTTCGCCCTGTTTTCAGCCCAATT	F		NFE2L3	Body	S_Shore	Y	rs11973455	7	26152122	G	1.391e-08	-0.19	0.06261	5.9e-17	-0.228	0.05005	cis
cg08972170	-0.382784	7	30185776	ACTTCACACTGAGTGTAGTGACTGTGTGTCTTTGTTTTCTCCTTCCGTCG	R		C7orf41	Body
cg06132400	0.0481645	7	38350938	CGGCAGCGGTTCTGTCGCGGGGACAAATGCCCTTTATAGATATTTTCTAA	R		TARP-AMPH		Island	Y	rs10282263	7	38351175	C	1.073e-12	-0.282	0.10186	1.006e-10	-0.2311	0.0302	cis
cg07076816	0.00224032	7	38351154	CGGCTACCCCTGCGGCCATGGACGCCATCTAAGCCATGAGGCTCGGCTGG	R		TARP-AMPH		Island	Y	rs10282263	7	38351175	C	3.984e-11	-0.28	0.08743	1.921e-08	-0.2406	0.02289	cis
cg00739278	0.0618947	7	38351226	GGGGCTGGGGGGCAGCGCGTGTGGGGGTCTGCTGGGCAGCAGGCTGGACG	F		TARP-AMPH		Island	N	rs2286693	7	38351975	G	6.75e-23	-0.232	0.19479	1.027e-17	-0.2235	0.05245	cis
cg10691866	0.0221687	7	65817282	CGGTAAACACAGAGCAGGAGGGAATTACAGTGAATGGGGATTTCCCTCAG	F		TPST1	Body
cg00277397	0.0949745	7	71800412	CGCTGTGTGTGTTGAGACACACGCAACATTCGTGCACATAGAACTCATGA	R		CALN1	5'UTR;Body	N_Shore	N	rs844750	7	71536769	T	3.347e-07	0.055	0.05432	1.644e-13	0.06816	0.0391	cis
cg14989226	0.252746	7	75897850	GGGAGAGCTGCCCCTCCCCAGACCTCAGGTCTCAGCAGCAAACATGTACG	R		SRRM3	Body	S_Shore
cg09596818	-0.0383243	7	98245716	CGGGCACTGTTGGACCACGTGGCTCCATCATGATGACTCCAGTTAGATGT	F		NPTX2	TSS1500	N_Shore
cg22633390	-0.0811874	7	100964966	GCCGGCTAAGCCGCGGCGGACAACTATGCTGAAAGCCAAGATCCTCTTCG	F		RABL5	1stExon;5'UTR;1stExon;1stExon;1stExon;5'UTR	Island
cg03473532	0.0160801	7	131008743	CGTATGTGTTTGAGATAGCAGTTGTTTACTATCACTTGAAAATTCTGAAT	R		MKLN1	Body	N_Shelf	N	rs35026077	7	130996875	A	4.928e-09	-0.071	0.06816	1.187e-12	-0.07929	0.03636	cis
cg00029246	0.0868973	7	137223417	ACCTTCACCAGGATAAGATCTCCCCTGTTTTTTGAAGCAGAGAACTATCG	F		DGKI	Body
cg22530232	-0.0582999	7	158110152	CGGTGTGGGACTAATGGGGACTAATTTATTTAGCTCGATTCCATTTGTCT	F	rs77703965	PTPRN2	Body;Body;Body	N_Shore
cg12133423	-0.0608059	8	1094575	TGTCTGTCTCCATCCTTTCGACCACCTCCAGAAGCTACAGGAAATAAACG	R		ERICH1-DLGAP2		N_Shore	N	rs13273462	8	1096698	T	1.408e-20	0.312	0.17104	3.455e-37	0.2952	0.1123	cis
cg16479633	-0.349055	8	20080666	GTCACTAATGGGTCACAGAGCTTTGTATCCTGAGCTAGTGGCAAAACTCG	R		ATP6V1B2-LZTS1
cg18898125	-0.128862	8	24770381	CGCCTTACCTTCTGCCCCTGCGGAAGCTGCGGACGTCCCCCAAACGTTAA	F		NEFM	TSS1500	N_Shore
cg16886403	0.249831	8	143471632	CGGAGTCCCCAGCAGTGTACAGCGTCTGTTATAAAGTCCCCCAAAGTGTA	R		TSNARE1	5'UTR	Island
cg07211259	0.285416	9	5510497	ACAAACTGCTAAAAGCAAAACCAAAACTTTCCAAATAAGCCAGGCTTTCG	R		PDCD1LG2	TSS200		N	rs12338205	9	5493994	G	1.084e-13	0.092	0.1082	3.452e-42	0.1861	0.127	cis
cg14577706	0.0564025	9	13280025	CGCAGGTTGACAAAATCGGCAGATAAAAATACAAGACTGCCATTAAATTT	R		MPDZ-NFIB		S_Shore	N	rs71507372	9	13281032	T	5.017e-19	-0.159	0.15714	7.058e-08	-0.1322	0.02108	cis
cg00232500	0.0909359	9	14910689	ATGCATGCACACATAGTGACCCACCCCACACATGTGCATGCATTCTCACG	R		FREM1	TSS1500		N	rs1412725	9	14906086	C	2.15e-07	-0.044	0.05303	3.131e-30	-0.1211	0.09129	cis
cg05072215	0.00554399	9	128001885	CGCCTGGCCAGACTGTAATTTAAATAAGGGTTAAACTATGTGACAATACA	R		HSPA5	Body	N_Shore
cg13753488	0.0171454	9	136001623	TGCTCTCCAGGGGCTTGTGGTTGTAGCCCCCAAGGAAAGGCAGGTGCACG	F		RALGDS	Body		N	rs571780	9	136001763	G	1.804e-54	-0.219	0.47998	2.028e-72	-0.24	0.2115	cis
cg13764516	-0.341565	9	139648911	CGGGCGCTCCGAACCTTGTGGTCTGAGGCAGGAACTCCATTAAATCAGCT	F		LCN8	3'UTR		Y	rs1108607	9	139648721	C	4.626e-22	0.08	0.18874	1.737e-19	0.07337	0.05803	cis
cg07096038	-0.0985537	X	39958181	CGTGGAGGCACCGGGAGGCGTGTGGGGGGCGGTCGGCGAGCGGAGATCCG	R	rs7879904	BCOR	TSS1500;5'UTR;TSS1500;5'UTR	Island
cg16203368	-0.103024	X	47431033	CGGGGGTCCCCCAATTCCAGAAGAACTGGAAAAGCACATGGGGACCCCCT	R		ARAF	3'UTR	N_Shelf
cg00780578	-0.0544718	X	68727150	CATCCAGCATGGCCCTTGTGGACTTCTGCAGGGCTTCCATGCTTTTAGCG	R		FAM155B	Body	S_Shore
cg16708895	-0.127514	X	144898249	CCACTAGCTGGAGAGGTAATTTTGCGTCTAATTTTGCACCTCTCTCCTCG	R		SLITRK2	TSS1500;TSS1500;TSS1500;TSS1500	N_Shore
