# Supplementary material for: DNA methylation-based estimator of telomere length
Source: Aging (Albany NY). 2019 Aug 18;11(16):5895–923. doi: 10.18632/aging.102173 (PMC6738410; doi:10.18632/aging.102173)
Supplement: Supplementary Data 2 [file aging-11-102173-s002.xlsx]

## Sheet: Meta analysis across studies
data	var	cell	Meta.Correlation	Meta.P
Meta	LTLadjAge	Bcell	0.01	7.1e-01
Meta	LTLadjAge	CD4T	0.05	7.5e-03
Meta	LTLadjAge	CD4.naive	0.11	4.5e-10
Meta	LTLadjAge	CD8.naive	0.19	2.1e-27
Meta	LTLadjAge	CD8T	-0.04	1.3e-02
Meta	LTLadjAge	CD8pCD28nCD45RAn	-0.12	8.2e-11
Meta	LTLadjAge	NK	-0.08	1.9e-06
Meta	LTLadjAge	PlasmaBlast	-0.02	2.3e-01
Meta	LTLadjAge	Mono	-0.04	2.8e-02
Meta	LTLadjAge	Gran	0.02	2.3e-01
Meta	DNAmTLadjAge	Bcell	0.14	8.3e-15
Meta	DNAmTLadjAge	CD4T	0.23	5.4e-39
Meta	DNAmTLadjAge	CD4.naive	0.28	5.4e-62
Meta	DNAmTLadjAge	CD8.naive	0.42	2.2e-151
Meta	DNAmTLadjAge	CD8T	-0.14	3.9e-15
Meta	DNAmTLadjAge	CD8pCD28nCD45RAn	-0.36	3e-102
Meta	DNAmTLadjAge	NK	-0.24	2e-43
Meta	DNAmTLadjAge	PlasmaBlast	-0.13	3.5e-14
Meta	DNAmTLadjAge	Mono	-0.15	2.3e-17
Meta	DNAmTLadjAge	Gran	-0.03	8e-02

## Sheet: LTLadjAge
data	var	cell	Correlation	SE	P
1. FHS test	LTLadjAge	Bcell	-0.0561162	0.0337336	0.0965683
1. FHS test	LTLadjAge	CD4T	0.0530509	0.0337393	0.116224
1. FHS test	LTLadjAge	CD4.naive	0.123535	0.0335281	0.000243195
1. FHS test	LTLadjAge	CD8.naive	0.18767	0.0331866	2.1094e-08
1. FHS test	LTLadjAge	CD8T	-0.0645568	0.0337164	0.0558562
1. FHS test	LTLadjAge	CD8pCD28nCD45RAn	-0.137774	0.0334647	4.20145e-05
1. FHS test	LTLadjAge	NK	-0.0467227	0.03375	0.166596
1. FHS test	LTLadjAge	PlasmaBlast	0.01646	0.0337823	0.626211
1. FHS test	LTLadjAge	Mono	-0.0875377	0.0336572	0.00945572
1. FHS test	LTLadjAge	Gran	0.0591107	0.0337278	0.0800238
2. WHI BA23 training	LTLadjAge	Bcell	0.0549913	0.0373152	0.141002
2. WHI BA23 training	LTLadjAge	CD4T	0.108665	0.0371505	0.00355357
2. WHI BA23 training	LTLadjAge	CD4.naive	0.13946	0.0370065	0.000177732
2. WHI BA23 training	LTLadjAge	CD8.naive	0.217083	0.0364806	4.17914e-09
2. WHI BA23 training	LTLadjAge	CD8T	-0.0642448	0.0372946	0.0853867
2. WHI BA23 training	LTLadjAge	CD8pCD28nCD45RAn	-0.227067	0.0363956	7.5383e-10
2. WHI BA23 training	LTLadjAge	NK	-0.118915	0.0371066	0.0014121
2. WHI BA23 training	LTLadjAge	PlasmaBlast	-0.0967684	0.0371964	0.00947193
2. WHI BA23 training	LTLadjAge	Mono	0.0433167	0.0373367	0.246369
2. WHI BA23 training	LTLadjAge	Gran	-0.0345552	0.0373494	0.355181
3. JHS traing	LTLadjAge	Bcell	0.0201715	0.0255103	0.42923
3. JHS traing	LTLadjAge	CD4T	0.0160068	0.0255122	0.530478
3. JHS traing	LTLadjAge	CD4.naive	0.0899034	0.0254122	0.000415471
3. JHS traing	LTLadjAge	CD8.naive	0.179257	0.0251022	1.42381e-12
3. JHS traing	LTLadjAge	CD8T	-0.0232254	0.0255086	0.362705
3. JHS traing	LTLadjAge	CD8pCD28nCD45RAn	-0.0470116	0.0254873	0.0653011
3. JHS traing	LTLadjAge	NK	-0.090388	0.0254111	0.000386461
3. JHS traing	LTLadjAge	PlasmaBlast	-0.00806899	0.0255147	0.751856
3. JHS traing	LTLadjAge	Mono	-0.0502045	0.0254833	0.0490074
3. JHS traing	LTLadjAge	Gran	0.0263579	0.0255067	0.301592

## Sheet: DNAmLTLadjAge
data	var	cell	Correlation	SE	P
1. FHS test	DNAmTLadjAge	Bcell	0.170086	0.0332946	3.9857e-07
1. FHS test	DNAmTLadjAge	CD4T	0.243858	0.0327669	2.36486e-13
1. FHS test	DNAmTLadjAge	CD4.naive	0.190288	0.0331695	1.32809e-08
1. FHS test	DNAmTLadjAge	CD8.naive	0.301661	0.0322129	6.27114e-20
1. FHS test	DNAmTLadjAge	CD8T	-0.193732	0.0331468	7.15631e-09
1. FHS test	DNAmTLadjAge	CD8pCD28nCD45RAn	-0.418376	0.0306877	1.60207e-38
1. FHS test	DNAmTLadjAge	NK	-0.212102	0.0330181	2.17833e-10
1. FHS test	DNAmTLadjAge	PlasmaBlast	-0.140222	0.0334531	3.05117e-05
1. FHS test	DNAmTLadjAge	Mono	-0.278446	0.0324507	4.25383e-17
1. FHS test	DNAmTLadjAge	Gran	-0.018995	0.0337808	0.574054
2. WHI BA23 training	DNAmTLadjAge	Bcell	0.174432	0.0367988	2.5769e-06
2. WHI BA23 training	DNAmTLadjAge	CD4T	0.286439	0.0358058	5.01656e-15
2. WHI BA23 training	DNAmTLadjAge	CD4.naive	0.401451	0.0342281	3.50072e-29
2. WHI BA23 training	DNAmTLadjAge	CD8.naive	0.530655	0.0316758	2.12943e-53
2. WHI BA23 training	DNAmTLadjAge	CD8T	-0.116218	0.0371185	0.00181302
2. WHI BA23 training	DNAmTLadjAge	CD8pCD28nCD45RAn	-0.513247	0.032074	1.68489e-49
2. WHI BA23 training	DNAmTLadjAge	NK	-0.308233	0.0355522	2.87585e-17
2. WHI BA23 training	DNAmTLadjAge	PlasmaBlast	-0.191864	0.0366774	2.21486e-07
2. WHI BA23 training	DNAmTLadjAge	Mono	-0.00389549	0.0373715	0.91701
2. WHI BA23 training	DNAmTLadjAge	Gran	-0.0964552	0.0371975	0.00970697
3. JHS traing	DNAmTLadjAge	Bcell	0.100774	0.0253939	7.56795e-05
3. JHS traing	DNAmTLadjAge	CD4T	0.18861	0.0250657	8.96098e-14
3. JHS traing	DNAmTLadjAge	CD4.naive	0.274901	0.0245405	4.72353e-28
3. JHS traing	DNAmTLadjAge	CD8.naive	0.427993	0.023068	1.71396e-69
3. JHS traing	DNAmTLadjAge	CD8T	-0.117821	0.0253461	3.6302e-06
3. JHS traing	DNAmTLadjAge	CD8pCD28nCD45RAn	-0.219103	0.0249036	3.66811e-18
3. JHS traing	DNAmTLadjAge	NK	-0.221756	0.0248883	1.41137e-18
3. JHS traing	DNAmTLadjAge	PlasmaBlast	-0.103151	0.0253877	5.08841e-05
3. JHS traing	DNAmTLadjAge	Mono	-0.137199	0.0252825	6.66428e-08
3. JHS traing	DNAmTLadjAge	Gran	-0.00748759	0.0255231	0.769283
