# Supplementary material for: DNA methylation-based estimator of telomere length
Source: Aging (Albany NY). 2019 Aug 18;11(16):5895–923. doi: 10.18632/aging.102173 (PMC6738410; doi:10.18632/aging.102173)
Supplement: Supplementary Data 3 [file aging-11-102173-s001.xlsx]

## Sheet: GWAS_results
				GWAS results of the mQTL SNPs (column B) retrived from GWAS Catelog, https://www.ebi.ac.uk/gwas/home
CpG	SNP	Genomic Region*	LD SNP (r2)	PUBMEDID	JOURNAL	LINK	MAPPED_TRAIT	STUDY	DISEASE.TRAIT	INITIAL.SAMPLE.SIZE	REPLICATION.SAMPLE.SIZE	P.VALUE from GWAS result
cg24049493	rs2147904	1p34.2	NA	27863252	Cell	www.ncbi.nlm.nih.gov/pubmed/27863252	basophil count, eosinophil count	The Allelic Landscape of Human Blood Cell Trait Variation and Links to Common Complex Disease.	Sum eosinophil basophil counts	171,771 European ancestry individuals	NA	2e-12
							eosinophil percentage of granulocytes		Eosinophil percentage of granulocytes	170,536 European ancestry individuals	NA	2e-12
							neutrophil percentage of granulocytes		Neutrophil percentage of granulocytes	170,672 European ancestry individuals	NA	1e-09
							eosinophil percentage of leukocytes		Eosinophil percentage of white cells	172,378 European ancestry individuals	NA	2e-13
							eosinophil count		Eosinophil counts	172,275 European ancestry individuals	NA	1e-14
cg07955474	rs305082	16q24.1	NA	27863252	Cell	www.ncbi.nlm.nih.gov/pubmed/27863252	granulocyte count		Granulocyte count	169,822 European ancestry individuals	NA	8e-16
							neutrophil count, eosinophil count		Sum neutrophil eosinophil counts	170,384 European ancestry individuals	NA	1e-15
							granulocyte percentage of myeloid white cells		Granulocyte percentage of myeloid white cells	169,545 European ancestry individuals	NA	8e-131
cg08893087	rs945631	1p22.1	NA	25646338	Am J Clin Nutr	www.ncbi.nlm.nih.gov/pubmed/25646338	trans fatty acid measurement, trans/trans-18:2 fatty acid measurement	Genetic loci associated with circulating phospholipid trans fatty acids: a meta-analysis of genome-wide association studies from the CHARGE Consortium.	Trans fatty acid levels	8,013 European ancestry individuals	1,082 African American individuals, 669 Chinese ancestry individuals, 657 Hispanic individuals	3e-06
			NA	30595370	Am J Hum Genet	www.ncbi.nlm.nih.gov/pubmed/30595370	eosinophil count	Leveraging Polygenic Functional Enrichment to Improve GWAS Power.	Eosinophil counts	approximately 440,000 European ancestry individuals	NA	2e-08
				GWAS results of the LD SNPs with mQTL SNPs (column C), retrived from HaploReg, https://pubs.broadinstitute.org/mammals/haploreg/haploreg.php
cg13523818	rs4808934	19p13.11	rs2011503 (0.8)	24618891	Nature Genetics	https://www.ncbi.nlm.nih.gov/pubmed/24618891	Bipolar disorder	Genome-wide association study reveals two new risk loci for bipolar disorder	Bipolar disorder	24,025 European ancestry individuals	NA	9e-08
			rs1064395 (0.97)	21353194	Am J Hum Genet	https://www.ncbi.nlm.nih.gov/pubmed/21353194	Bipolar disorder	Genome-wide association study identifies genetic variation in neurocan as a susceptibility factor for bipolar disorder	Bipolar disorder	6,024 European ancestry individuals	37,779 European ancestry individuals	2e-09
*corresponding the SNPs listed in collum B
