# Supplementary material for: DNA methylation-based estimator of telomere length
Source: Aging (Albany NY). 2019 Aug 18;11(16):5895–923. doi: 10.18632/aging.102173 (PMC6738410; doi:10.18632/aging.102173)
Supplement: Supplementary Data 4 [file aging-11-102173-s004.xlsx]

## Sheet: Summary
The following sheets 2-4 list the gene sets at FDR <0.05 based on (1) the 140 CpGs underlying DNAm TL model, (2) the 72 markers out of the 140 CpGs, in which they have negative coefficients in the DNAm TL model, and (3) the 68 markers out of the 140 CpGs, in which they have positive coefficients in the DNAm TL model.
Name	Number of CpGs	Number of highlighted gene set (Binomial FDR < 0.05)	Number of highlighted gene set (Binomial Bonferroni < 0.05)
All	140	25	10
Negative	72	11	10
Positive	68	41	4

## Sheet: All
CpG	Database	ID	Desc	GeneSetSize	GeneSetCov	BinomP	Binom.FDR	Binom.Bon	RegionFoldEnrich	ExpRegions	ObsRegions	GenomeFrac	SetCov	HyperRank	HyperP	Hyper.FDR	Hyper.Bon	GeneFoldEnrich	ExpGenes	ObsGenes	TermCov
All	GO Biological Process	GO:0050779	RNA destabilization	6	0.00456621	4.5e-05	1.6e-02	1.6e-02	45.361	0.066136	3	0.0004724	0.0214286	407	7.1e-02	1.3e-01	3.3e+00	13.7298	0.0728341	1	0.166667
All	GO Biological Process	GO:0051043	regulation of membrane protein ectodomain proteolysis	17	0.00913242	8.7e-05	1.6e-02	3.2e-02	17.6984	0.226009	4	0.00161435	0.0285714	105	1.8e-02	8.7e-02	7.2e+00	9.69165	0.206363	2	0.117647
All	GO Biological Process	GO:0010608	posttranscriptional regulation of gene expression	399	0.0547945	3.0e-04	3.7e-02	1.1e-01	2.96004	4.72966	14	0.0337833	0.1	20	3.6e-03	6.5e-02	2.8e+00	2.47756	4.84347	12	0.0300752
All	GO Biological Process	GO:0051044	positive regulation of membrane protein ectodomain proteolysis	13	0.00456621	6.8e-04	4.4e-02	2.5e-01	17.9093	0.16751	3	0.0011965	0.0214286	781	1.5e-01	1.7e-01	3.8e+00	6.33685	0.157807	1	0.0769231
All	GO Biological Process	GO:0071474	cellular hyperosmotic response	6	0.00456621	7.0e-04	4.4e-02	2.6e-01	52.6803	0.0379649	2	0.000271178	0.0142857	407	7.1e-02	1.3e-01	2.2e+01	13.7298	0.0728341	1	0.166667
All	GO Biological Process	GO:0016339	calcium-dependent cell-cell adhesion	26	0.0182648	7.2e-04	4.4e-02	2.6e-01	10.1149	0.395457	4	0.00282469	0.0285714	7	2.6e-04	1.3e-02	8.0e+00	12.6737	0.315614	4	0.153846
All	GO Cellular Component	GO:0043196	varicosity	6	0.00456621	1.1e-04	3.1e-02	3.1e-02	33.7531	0.0888808	3	0.000634863	0.0214286	60	7.1e-02	4.5e-01	2.6e+00	13.7298	0.0728341	1	0.166667
All	PANTHER Pathway	P00006	Apoptosis signaling pathway	105	0.0182648	9.7e-04	3.9e-02	3.9e-02	5.38112	1.11501	6	0.00796435	0.0428571	9	3.9e-02	1.6e-01	3.6e-01	3.13825	1.2746	4	0.0380952
All	BioCyc Pathway	PWY-6861	the visual cycle I (vertebrates)	16	0.00913242	3.8e-04	7.3e-03	7.3e-03	21.8224	0.137473	3	0.000981951	0.0214286	1	1.6e-02	1.9e-01	1.7e-01	10.2974	0.194224	2	0.125
All	BioCyc Pathway	PWY-6857	retinol biosynthesis	18	0.00913242	8.4e-04	8.0e-03	1.6e-02	16.6242	0.18046	3	0.001289	0.0214286	2	2.0e-02	1.9e-01	3.8e-01	9.15322	0.218502	2	0.111111
All	MSigDB Pathway	BIOCARTA_SODD_PATHWAY	SODD/TNFR1 Signaling Pathway	10	0.00456621	5.2e-05	2.5e-02	2.5e-02	43.0535	0.0696808	3	0.00049772	0.0214286	91	1.1e-01	5.3e-01	4.3e+00	8.2379	0.12139	1	0.1
All	MSigDB Pathway	BIOCARTA_NDKDYNAMIN_PATHWAY	Endocytotic role of NDK, Phosphins and Dynamin	19	0.00913242	1.9e-04	4.2e-02	9.2e-02	14.4255	0.277286	4	0.00198062	0.0285714	31	2.2e-02	3.4e-01	9.6e+00	8.67147	0.230641	2	0.105263
All	MSigDB Pathway	KEGG_VEGF_SIGNALING_PATHWAY	VEGF signaling pathway	76	0.0273973	2.8e-04	4.2e-02	1.4e-01	6.80976	0.881089	6	0.00629349	0.0428571	1	3.2e-04	1.4e-01	3.6e+00	6.50361	0.922565	6	0.0789474
All	MSigDB Pathway	BIOCARTA_RELA_PATHWAY	Acetylation and Deacetylation of RelA in The Nucleus	16	0.00456621	3.4e-04	4.2e-02	1.7e-01	22.6648	0.132364	3	0.000945454	0.0214286	142	1.8e-01	5.3e-01	5.1e+00	5.14869	0.194224	1	0.0625
All	MSigDB miRNA Motifs	GGGACCA,MIR-133A,MIR-133B	Targets of MicroRNA GGGACCA,MIR-133A,MIR-133B	191	0.0547945	5.1e-05	8.9e-03	8.9e-03	4.37172	2.51617	11	0.0179726	0.0785714	1	3.9e-06	6.8e-04	1.6e+00	5.17564	2.31855	12	0.0628272
All	MSigDB miRNA Motifs	AGCTCCT,MIR-28	Targets of MicroRNA AGCTCCT,MIR-28	85	0.0273973	1.1e-04	9.4e-03	1.9e-02	5.58975	1.43119	8	0.0102228	0.0571429	3	5.9e-04	3.4e-02	3.4e+00	5.81499	1.03182	6	0.0705882
All	MSigDB miRNA Motifs	TCCAGAG,MIR-518C	Targets of MicroRNA TCCAGAG,MIR-518C	142	0.0456621	5.3e-04	3.0e-02	9.1e-02	3.94272	2.28269	9	0.0163049	0.0642857	2	9.3e-06	8.1e-04	1.3e+00	5.80134	1.72374	10	0.0704225
All	InterPro	IPR013164	Cadherin, N-terminal	63	0.0456621	1.0e-07	3.9e-05	3.9e-05	11.7004	0.769202	9	0.0054943	0.0642857	1	4.1e-09	1.5e-06	3.3e+00	13.076	0.764758	10	0.15873
All	MSigDB Immunologic Signatures	GSE22886_NAIVE_BCELL_VS_MONOCYTE_DN	Genes down-regulated in comparison of naive B cells versus day 0 monocytes.	199	0.0365297	1.0e-04	4.7e-02	5.2e-02	4.4213	2.26178	10	0.0161555	0.0714286	14	3.0e-03	1.1e-01	4.5e+00	3.31172	2.41566	8	0.040201
All	MSigDB Immunologic Signatures	GSE17721_CTRL_VS_POLYIC_0.5H_BMDM_DN	Genes down-regulated in comparison of control dendritic cells (DC) at 0 h versus those stimulated with poly(I:C) (TLR3 agonist) at 0.5 h.	198	0.0502283	3.9e-04	4.7e-02	2.0e-01	3.73635	2.67641	10	0.0191172	0.0714286	1	3.1e-05	1.6e-02	9.9e+00	4.57661	2.40353	11	0.0555556
All	MSigDB Immunologic Signatures	GSE22886_CD4_TCELL_VS_BCELL_NAIVE_UP	Genes up-regulated in comparison of naive CD4 [GeneID=920] T cells versus naive B cells.	193	0.0365297	4.0e-04	4.7e-02	2.0e-01	4.09216	2.19933	9	0.0157095	0.0642857	8	2.5e-03	1.1e-01	3.8e+00	3.41467	2.34283	8	0.0414508
All	MSigDB Immunologic Signatures	GSE34205_HEALTHY_VS_FLU_INF_INFANT_PBMC_UP	Genes up-regulated in comparison of peripheral blood mononuclear cells (PBMC) from healthy donors versus PBMCs from infanct with acute influenza infection.	184	0.0365297	5.3e-04	4.7e-02	2.7e-01	3.93307	2.28829	9	0.0163449	0.0642857	4	1.9e-03	1.1e-01	5.2e+00	3.58169	2.23358	8	0.0434783
All	MSigDB Immunologic Signatures	GSE12845_IGD_NEG_BLOOD_VS_DARKZONE_GC_TONSIL_BCELL_UP	Genes up-regulated in comparison of IgD- peripheral blood B cells versus dark zone germinal center B cells.	181	0.022831	6.5e-04	4.7e-02	3.2e-01	4.26831	1.87428	8	0.0133877	0.0571429	115	7.0e-02	2.2e-01	3.0e+01	2.27566	2.19716	5	0.0276243
All	MSigDB Immunologic Signatures	GSE11057_CD4_CENT_MEM_VS_PBMC_DN	Genes down-regulated in comparison of central memory T cells versus peripheral blood mononuclear cells (PBMC).	186	0.0365297	6.5e-04	4.7e-02	3.2e-01	3.49898	2.85798	10	0.0204141	0.0714286	5	2.0e-03	1.1e-01	1.1e+01	3.54318	2.25786	8	0.0430108
All	MSigDB Immunologic Signatures	GSE17721_CTRL_VS_CPG_24H_BMDM_DN	Genes down-regulated in comparison of control dendritic cells (DC) at 24 h versus those stimulated with CpG DNA (TLR9 agonist) at 24 h.	196	0.0365297	6.6e-04	4.7e-02	3.3e-01	3.81858	2.35689	9	0.016835	0.0642857	10	2.8e-03	1.1e-01	1.7e+01	3.36241	2.37925	8	0.0408163

## Sheet: Negative
CpG	Database	ID	Desc	GeneSetSize	GeneSetCov	BinomP	Binom.FDR	Binom.Bon	RegionFoldEnrich	ExpRegions	ObsRegions	GenomeFrac	SetCov	HyperRank	HyperP	Hyper.FDR	Hyper.Bon	GeneFoldEnrich	ExpGenes	ObsGenes	TermCov
Negative	GO Biological Process	GO:0016339	calcium-dependent cell-cell adhesion	26	0.0347826	5.6e-05	1.5e-02	2.3e-02	19.6678	0.203378	4	0.00282469	0.0555556	3	2.1e-05	2.9e-03	1.1e+00	24.1351	0.165734	4	0.153846
Negative	GO Biological Process	GO:0007156	homophilic cell adhesion	140	0.0869565	7.1e-05	1.5e-02	2.9e-02	5.06501	1.7769	9	0.0246791	0.125	1	2.1e-08	8.9e-06	2.4e+00	11.2056	0.892412	10	0.0714286
Negative	PANTHER Pathway	P00012	Cadherin signaling pathway	151	0.0782609	4.2e-04	1.1e-02	1.1e-02	4.47318	1.78844	8	0.0248394	0.111111	1	5.2e-07	1.4e-05	6.6e-02	9.35036	0.96253	9	0.0596027
Negative	BioCyc Pathway	PWY-6861	the visual cycle I (vertebrates)	16	0.0173913	2.4e-03	1.6e-02	1.9e-02	28.2883	0.0707005	2	0.000981951	0.0277778	1	4.6e-03	2.3e-02	2.0e-02	19.6098	0.10199	2	0.125
Negative	BioCyc Pathway	PWY-6857	retinol biosynthesis	18	0.0173913	4.0e-03	1.6e-02	3.2e-02	21.5499	0.0928078	2	0.001289	0.0277778	2	5.8e-03	2.3e-02	4.6e-02	17.4309	0.114739	2	0.111111
Negative	MSigDB miRNA Motifs	GGGACCA,MIR-133A,MIR-133B	Targets of MicroRNA GGGACCA,MIR-133A,MIR-133B	191	0.0695652	3.2e-04	4.7e-02	4.7e-02	5.40946	1.29403	7	0.0179726	0.0972222	1	3.1e-05	2.5e-03	3.7e-01	6.57082	1.21751	8	0.0418848
Negative	InterPro	IPR013164	Cadherin, N-terminal	63	0.0869565	2.8e-10	6.6e-08	6.6e-08	22.7508	0.39559	9	0.0054943	0.125	1	7.2e-12	1.7e-09	5.9e-01	24.9013	0.401585	10	0.15873
Negative	InterPro	IPR020894	Cadherin conserved site	108	0.0869565	6.3e-06	5.8e-04	1.5e-03	6.9185	1.30086	9	0.0180675	0.125	2	1.7e-09	2.0e-07	1.3e+00	14.5258	0.688432	10	0.0925926
Negative	InterPro	IPR002126	Cadherin	114	0.0869565	9.5e-06	5.8e-04	2.2e-03	6.56063	1.37182	9	0.019053	0.125	3	2.9e-09	2.2e-07	9.2e-02	13.7613	0.726678	10	0.0877193
Negative	InterPro	IPR015919	Cadherin-like	117	0.0869565	1.0e-05	5.8e-04	2.3e-03	6.52346	1.37963	9	0.0191616	0.125	4	3.8e-09	2.2e-07	1.0e+01	13.4084	0.745801	10	0.0854701
Negative	InterPro	IPR002070	Transcription factor, Brachyury	5	0.0173913	8.6e-04	4.0e-02	2.0e-01	47.0989	0.0424638	2	0.000589775	0.0277778	8	4.0e-04	1.3e-02	7.8e+00	62.7513	0.0318719	2	0.4

## Sheet: Positive
CpG	Database	ID	Desc	GeneSetSize	GeneSetCov	BinomP	Binom.FDR	Binom.Bon	RegionFoldEnrich	ExpRegions	ObsRegions	GenomeFrac	SetCov	HyperRank	HyperP	Hyper.FDR	Hyper.Bon	GeneFoldEnrich	ExpGenes	ObsGenes	TermCov
Positive	GO Molecular Function	GO:0005328	neurotransmitter:sodium symporter activity	19	0.0183486	2.1e-04	4.0e-02	6.4e-02	26.6971	0.112372	3	0.00165252	0.0441177	4	5.8e-03	3.1e-01	1.8e+00	17.4225	0.114794	2	0.105263
Positive	GO Molecular Function	GO:0005326	neurotransmitter transporter activity	24	0.0183486	3.4e-04	4.0e-02	1.0e-01	22.6651	0.132362	3	0.0019465	0.0441177	14	9.2e-03	3.1e-01	2.8e+00	13.7928	0.145003	2	0.0833333
Positive	GO Molecular Function	GO:0015185	gamma-aminobutyric acid transmembrane transporter activity	5	0.00917431	3.9e-04	4.0e-02	1.2e-01	70.2298	0.0284779	2	0.000418793	0.0294118	45	3.0e-02	3.1e-01	9.2e+00	33.1028	0.030209	1	0.2
Positive	GO Biological Process	GO:0071474	cellular hyperosmotic response	6	0.00917431	1.7e-04	3.7e-02	7.1e-02	108.459	0.0184401	2	0.000271178	0.0294118	170	3.6e-02	1.2e-01	2.5e+00	27.5856	0.0362508	1	0.166667
Positive	GO Biological Process	GO:0006884	cell volume homeostasis	16	0.0183486	1.7e-04	3.7e-02	7.4e-02	28.5863	0.104945	3	0.00154331	0.0441177	18	4.1e-03	8.1e-02	3.9e+00	20.6892	0.0966687	2	0.125
Positive	GO Biological Process	GO:0051656	establishment of organelle localization	178	0.0458716	2.6e-04	3.8e-02	1.1e-01	5.5828	1.25385	7	0.018439	0.102941	21	4.5e-03	8.1e-02	1.3e+01	4.64926	1.07544	5	0.0280899
Positive	GO Biological Process	GO:0010608	posttranscriptional regulation of gene expression	399	0.0733945	4.7e-04	3.9e-02	2.0e-01	3.9177	2.29726	9	0.0337833	0.132353	14	2.9e-03	8.1e-02	1.8e+01	3.31857	2.41068	8	0.0200501
Positive	GO Biological Process	GO:0050779	RNA destabilization	6	0.00917431	5.0e-04	3.9e-02	2.1e-01	62.2603	0.0321232	2	0.0004724	0.0294118	170	3.6e-02	1.2e-01	2.0e+01	27.5856	0.0362508	1	0.166667
Positive	GO Biological Process	GO:0051640	organelle localization	244	0.0550459	5.4e-04	3.9e-02	2.3e-01	4.29296	1.86352	8	0.0274047	0.117647	17	3.7e-03	8.1e-02	2.3e+01	4.07001	1.4742	6	0.0245902
Positive	GO Biological Process	GO:0048488	synaptic vesicle endocytosis	21	0.00917431	7.3e-04	4.5e-02	3.2e-01	17.3258	0.173152	3	0.00254636	0.0441177	547	1.2e-01	1.5e-01	6.8e+00	7.88161	0.126878	1	0.0476191
Positive	GO Biological Process	GO:0060337	type I interferon-mediated signaling pathway	64	0.0366973	1.1e-03	4.8e-02	4.6e-01	15.1602	0.197886	3	0.00291009	0.0441177	2	6.1e-04	6.1e-02	8.3e-01	10.3446	0.386675	4	0.0625
Positive	GO Biological Process	GO:0071357	cellular response to type I interferon	65	0.0366973	1.1e-03	4.8e-02	4.6e-01	15.1493	0.198029	3	0.00291219	0.0441177	3	6.4e-04	6.1e-02	1.2e+00	10.1855	0.392717	4	0.0615385
Positive	GO Biological Process	GO:0034340	response to type I interferon	66	0.0366973	1.1e-03	4.8e-02	4.8e-01	14.9679	0.200429	3	0.00294749	0.0441177	4	6.8e-04	6.1e-02	1.5e+01	10.0311	0.398758	4	0.0606061
Positive	GO Cellular Component	GO:0005923	tight junction	107	0.0550459	3.1e-04	3.8e-02	6.6e-02	6.60438	0.908488	6	0.0133601	0.0882353	1	4.7e-05	1.0e-02	1.2e+00	9.28115	0.646472	6	0.0560748
Positive	GO Cellular Component	GO:0005761	mitochondrial ribosome	54	0.0275229	6.5e-04	3.8e-02	1.4e-01	18.0822	0.165909	3	0.00243984	0.0441177	12	4.3e-03	1.3e-01	2.0e+00	9.19521	0.326257	3	0.0555556
Positive	GO Cellular Component	GO:0030672	synaptic vesicle membrane	49	0.0183486	7.4e-04	3.8e-02	1.6e-01	9.92684	0.402948	4	0.0059257	0.0588235	42	3.5e-02	2.6e-01	6.4e+00	6.75566	0.296048	2	0.0408163
Positive	GO Cellular Component	GO:0043296	apical junction complex	123	0.0550459	7.5e-04	3.8e-02	1.6e-01	5.56273	1.07861	6	0.0158619	0.0882353	2	1.0e-04	1.1e-02	8.9e+00	8.07384	0.743141	6	0.0487805
Positive	GO Cellular Component	GO:0043196	varicosity	6	0.00917431	8.9e-04	3.8e-02	1.9e-01	46.3277	0.0431707	2	0.000634863	0.0294118	44	3.6e-02	2.6e-01	1.0e+01	27.5856	0.0362508	1	0.166667
Positive	BioCyc Pathway	PWY66-399	gluconeogenesis	24	0.0183486	1.9e-03	2.5e-02	2.5e-02	31.408	0.0636781	2	0.000936442	0.0294118	1	9.2e-03	1.2e-01	7.5e-02	13.7928	0.145003	2	0.0833333
Positive	MSigDB Pathway	KEGG_VEGF_SIGNALING_PATHWAY	VEGF signaling pathway	76	0.0458716	7.4e-05	2.6e-02	2.6e-02	11.6834	0.427957	5	0.00629349	0.0735294	1	9.6e-05	3.3e-02	2.0e+00	10.8891	0.459176	5	0.0657895
Positive	MSigDB Pathway	REACTOME_NA_CL_DEPENDENT_NEUROTRANSMITTER_TRANSPORTERS	Genes involved in Na+/Cl- dependent neurotransmitter transporters	17	0.0183486	2.1e-04	3.2e-02	7.4e-02	26.4426	0.113453	3	0.00166843	0.0441177	12	4.6e-03	1.2e-01	3.2e+00	19.4722	0.10271	2	0.117647
Positive	MSigDB Pathway	BIOCARTA_NDKDYNAMIN_PATHWAY	Endocytotic role of NDK, Phosphins and Dynamin	19	0.00917431	3.5e-04	3.2e-02	1.2e-01	22.2747	0.134682	3	0.00198062	0.0441177	126	1.1e-01	2.8e-01	1.0e+01	8.71125	0.114794	1	0.0526316
Positive	MSigDB Pathway	PID_ERBB1_INTERNALIZATION_PATHWAY	Internalization of ErbB1	42	0.0183486	5.2e-04	3.2e-02	1.8e-01	10.917	0.366401	4	0.00538825	0.0588235	48	2.7e-02	1.9e-01	1.4e+01	7.88161	0.253755	2	0.0476191
Positive	MSigDB Pathway	BIOCARTA_SODD_PATHWAY	SODD/TNFR1 Signaling Pathway	10	0.00917431	5.5e-04	3.2e-02	1.9e-01	59.093	0.0338449	2	0.00049772	0.0294118	74	5.9e-02	2.6e-01	1.6e+01	16.5514	0.0604179	1	0.1
Positive	MSigDB Pathway	KEGG_FC_GAMMA_R_MEDIATED_PHAGOCYTOSIS	Fc gamma R-mediated phagocytosis	96	0.0275229	5.5e-04	3.2e-02	1.9e-01	7.5342	0.663641	5	0.00975942	0.0735294	42	2.0e-02	1.7e-01	1.8e+01	5.1723	0.580012	3	0.03125
Positive	MSigDB Pathway	REACTOME_INTERFERON_ALPHA_BETA_SIGNALING	Genes involved in Interferon alpha/beta signaling	63	0.0366973	8.2e-04	3.7e-02	2.8e-01	16.653	0.180148	3	0.00264923	0.0441177	5	5.7e-04	4.0e-02	5.5e+00	10.5088	0.380633	4	0.0634921
Positive	MSigDB Pathway	KEGG_ENDOCYTOSIS	Endocytosis	181	0.0550459	8.5e-04	3.7e-02	2.9e-01	5.4288	1.10522	6	0.0162532	0.0882353	6	8.1e-04	4.3e-02	6.6e-01	5.48664	1.09356	6	0.0331492
Positive	MSigDB Pathway	REACTOME_AMINO_ACID_TRANSPORT_ACROSS_THE_PLASMA_MEMBRANE	Genes involved in Amino acid transport across the plasma membrane	30	0.0183486	1.1e-03	3.7e-02	3.7e-01	15.2336	0.196934	3	0.00289608	0.0441177	26	1.4e-02	1.6e-01	9.3e-01	11.0343	0.181254	2	0.0666667
Positive	MSigDB Pathway	REACTOME_AMINE_COMPOUND_SLC_TRANSPORTERS	Genes involved in Amine compound SLC transporters	27	0.0183486	1.1e-03	3.7e-02	3.7e-01	15.1462	0.198069	3	0.00291278	0.0441177	21	1.2e-02	1.6e-01	1.2e+01	12.2603	0.163128	2	0.0740741
Positive	InterPro	IPR006187	Claudin	25	0.0275229	2.0e-04	1.8e-02	4.8e-02	26.9327	0.111389	3	0.00163807	0.0441177	2	4.5e-04	1.1e-01	1.4e+00	19.8617	0.151045	3	0.12
Positive	InterPro	IPR000175	Sodium:neurotransmitter symporter	19	0.0183486	2.1e-04	1.8e-02	4.9e-02	26.6971	0.112372	3	0.00165252	0.0441177	10	5.8e-03	1.2e-01	2.2e+00	17.4225	0.114794	2	0.105263
Positive	InterPro	IPR004148	BAR domain	15	0.00917431	2.3e-04	1.8e-02	5.5e-02	25.6766	0.116838	3	0.00171821	0.0441177	166	8.7e-02	2.2e-01	7.0e+00	11.0343	0.0906269	1	0.0666667
Positive	InterPro	IPR010504	Arfaptin homology (AH) domain	20	0.00917431	5.1e-04	3.0e-02	1.2e-01	19.6354	0.152785	3	0.00224684	0.0441177	188	1.1e-01	2.4e-01	9.8e+00	8.27569	0.120836	1	0.05
Positive	InterPro	IPR000270	Phox/Bem1p	14	0.0183486	1.1e-03	4.6e-02	2.7e-01	40.9491	0.0488411	2	0.000718252	0.0294118	4	3.1e-03	1.2e-01	1.1e+01	23.6448	0.0845851	2	0.142857
Positive	InterPro	IPR027267	Arfaptin homology (AH) domain/BAR domain	28	0.00917431	1.2e-03	4.6e-02	2.8e-01	14.6617	0.204615	3	0.00300904	0.0441177	216	1.6e-01	2.6e-01	1.2e+01	5.91121	0.16917	1	0.0357143
Positive	InterPro	IPR001452	Src homology-3 domain	209	0.0366973	1.5e-03	4.6e-02	3.6e-01	4.1342	1.6932	7	0.0248999	0.102941	115	3.8e-02	2.0e-01	3.7e+00	3.16773	1.26273	4	0.0191388
Positive	InterPro	IPR025799	Protein arginine N-methyltransferase	9	0.00917431	1.6e-03	4.6e-02	3.8e-01	34.4115	0.0581201	2	0.000854707	0.0294118	131	5.3e-02	2.0e-01	4.5e-01	18.3904	0.0543761	1	0.111111
Positive	InterPro	IPR006073	GTP binding domain	19	0.0183486	1.8e-03	4.6e-02	4.3e-01	32.0659	0.0623715	2	0.000917228	0.0294118	10	5.8e-03	1.2e-01	6.3e-01	17.4225	0.114794	2	0.105263
Positive	InterPro	IPR000048	IQ motif, EF-hand binding site	76	0.0275229	1.9e-03	4.6e-02	4.6e-01	7.62383	0.524671	4	0.00771574	0.0588235	49	1.1e-02	1.8e-01	8.0e+00	6.53344	0.459176	3	0.0394737
Positive	MSigDB Immunologic Signatures	GSE14000_TRANSLATED_RNA_VS_MRNA_4H_LPS_DC_DN	Genes down-regulated in comparison of polysome bound (translated) mRNA versus total mRNA 4 h after LPS (TLR4 agonist) stimulation.	178	0.0366973	1.6e-04	4.5e-02	8.1e-02	7.44137	0.806303	6	0.0118574	0.0882353	37	2.3e-02	1.7e-01	2.9e+00	3.71941	1.07544	4	0.0224719
Positive	MSigDB Immunologic Signatures	GSE36476_CTRL_VS_TSST_ACT_40H_MEMORY_CD4_TCELL_YOUNG_DN	Genes down-regulated in comparison of untreated CD4 [GeneID=920] memory T cells from young donors versus those treated with TSST at 40 h.	198	0.0458716	1.8e-04	4.5e-02	9.0e-02	7.29133	0.822895	6	0.0121014	0.0882353	25	7.0e-03	1.4e-01	4.6e+00	4.17964	1.19627	5	0.0252525
